# Supplementary material for: Coexpression Pattern Analysis of NPM1-Associated Genes in Chronic Myelogenous Leukemia
Source: Hindawi journal article supplement (doi:10.1155/2015/610595), 2015-01-01
Supplement: f2 [file 610595.f2.pdf]

Table S2. Biological process\_Enriched GO terms for the functional annotation of NPM1-associated genes.

| # | Enriched GO terms                  | Genes found in our data | EASE score             | FDR                    |
|---|------------------------------------|-------------------------|------------------------|------------------------|
| 1 | Translational elongation           | 35                      | $6.80 \times 10^{-51}$ | $9.00 \times 10^{-48}$ |
| 2 | Translation                        | 38                      | $3.20 \times 10^{-36}$ | $4.20 \times 10^{-33}$ |
| 3 | Cellular protein metabolic process | 53                      | $6.00 \times 10^{-18}$ | $7.90 \times 10^{-15}$ |
| 4 | RNA processing                     | 23                      | $8.60 \times 10^{-12}$ | $1.10 \times 10^{-08}$ |
| 5 | RNA metabolic process              | 26                      | $1.70 \times 10^{-09}$ | $2.20 \times 10^{-06}$ |
| 6 | mRNA processing                    | 14                      | $2.40 \times 10^{-07}$ | $3.20 \times 10^{-04}$ |
| 7 | RNA splicing                       | 13                      | $4.70 \times 10^{-07}$ | $6.20 \times 10^{-04}$ |
| 8 | mRNA metabolic process             | 14                      | $1.20 \times 10^{-06}$ | $1.60 \times 10^{-03}$ |

GO: gene ontology. EASE score: a modified Fisher exact test, Expression Analysis Systematic Explorer score. FDR: false discovery rate.

Table S3. Cellular component\_Enriched GO terms for the functional annotation of NPM1-associated genes.

| #  | Enriched GO terms                            | Genes found in our data | EASE score             | FDR                    |
|----|----------------------------------------------|-------------------------|------------------------|------------------------|
| 1  | Ribonucleoprotein complex                    | 51                      | $6.40 \times 10^{-49}$ | $7.60 \times 10^{-46}$ |
| 2  | Ribosome                                     | 35                      | $1.80 \times 10^{-39}$ | $2.10 \times 10^{-36}$ |
| 3  | Cytosolic ribosome                           | 26                      | $7.90 \times 10^{-37}$ | $9.40 \times 10^{-34}$ |
| 4  | Ribosomal subunit                            | 29                      | $1.50 \times 10^{-36}$ | $1.80 \times 10^{-33}$ |
| 5  | Cytosol                                      | 53                      | $5.90 \times 10^{-31}$ | $7.10 \times 10^{-28}$ |
| 6  | Cytosolic part                               | 27                      | $6.80 \times 10^{-31}$ | $8.10 \times 10^{-28}$ |
| 7  | Cytosolic small ribosomal subunit            | 14                      | $9.10 \times 10^{-20}$ | $1.10 \times 10^{-16}$ |
| 8  | Small ribosomal subunit                      | 15                      | $1.40 \times 10^{-18}$ | $1.60 \times 10^{-15}$ |
| 9  | Large ribosomal subunit                      | 15                      | $3.50 \times 10^{-18}$ | $4.10 \times 10^{-15}$ |
| 10 | Intracellular non-membrane-bounded organelle | 54                      | $4.00 \times 10^{-18}$ | $4.80 \times 10^{-15}$ |
| 11 | Intracellular organelle part                 | 65                      | $2.10 \times 10^{-16}$ | $2.70 \times 10^{-13}$ |

|    |                                         |    |                        |                        |
|----|-----------------------------------------|----|------------------------|------------------------|
| 12 | Cytosolic large ribosomal subunit       | 12 | $3.10 \times 10^{-16}$ | $4.00 \times 10^{-13}$ |
| 13 | Cytoplasmic part                        | 67 | $2.20 \times 10^{-14}$ | $2.60 \times 10^{-11}$ |
| 14 | Cytoplasm                               | 79 | $5.90 \times 10^{-13}$ | $7.00 \times 10^{-10}$ |
| 15 | Intracellular organelle                 | 82 | $2.50 \times 10^{-09}$ | $3.00 \times 10^{-06}$ |
| 16 | Nuclear part                            | 33 | $2.00 \times 10^{-08}$ | $2.30 \times 10^{-05}$ |
| 17 | Nuclear lumen                           | 29 | $2.90 \times 10^{-08}$ | $3.40 \times 10^{-05}$ |
| 18 | Intracellular organelle lumen           | 32 | $4.30 \times 10^{-08}$ | $5.20 \times 10^{-05}$ |
| 19 | Spliceosome                             | 10 | $1.30 \times 10^{-07}$ | $1.50 \times 10^{-04}$ |
| 20 | Nucleolus                               | 19 | $2.40 \times 10^{-07}$ | $2.90 \times 10^{-04}$ |
| 21 | Small nuclear ribonucleoprotein complex | 5  | $1.40 \times 10^{-05}$ | $1.60 \times 10^{-02}$ |

---

GO: gene ontology. EASE score: a modified Fisher exact test, Expression Analysis Systematic Explorer score. FDR: false discovery rate.
