# Supplementary material for: Coexpression Pattern Analysis of NPM1-Associated Genes in Chronic Myelogenous Leukemia
Source: Biomed Res Int. 2015 Apr 15;2015:610595. doi: 10.1155/2015/610595 (PMC4413041; doi:10.1155/2015/610595)
Supplement: Supplementary file 1 — The detailed coexpression networks for the mapped strongly coexpressed pairs are shown in Figures S1, S2, S3 and S4. The 93 NPM1-associated genes that can be found in the microarray dataset GSE5550 are shown in Table S1. The enriched biological process GO terms for the functional annotation of NPM1-associated genes are shown in Table S2. The enriched cellular component GO terms for the functional annotation of NPM1-associated genes are shown in Table S3. [file 610595.f1.xls]

## Sheet: NPM1-associated genes
NPM1-associated genes found in GSE5550
Official gene symbol	Gene Title
ACTG1	actin, gamma 1
APEX1	APEX nuclease (multifunctional DNA repair enzyme) 1
APRT	adenine phosphoribosyltransferase
ATP5B	ATP synthase, H+ transporting, mitochondrial F1 complex, beta polypeptide
ATP5G3	ATP synthase, H+ transporting, mitochondrial Fo complex, subunit C3 (subunit 9)
CLIC1	chloride intracellular channel 1
COL16A1	collagen, type XVI, alpha 1
DUT	deoxyuridine triphosphatase
EEF1B2	eukaryotic translation elongation factor 1 beta 2
EEF2	eukaryotic translation elongation factor 2
EIF3F	eukaryotic translation initiation factor 3, subunit F
EIF4B	eukaryotic translation initiation factor 4B
FXR1	fragile X mental retardation, autosomal homolog 1
GNB2L1	guanine nucleotide binding protein (G protein), beta polypeptide 2-like 1
H2AFZ	H2A histone family, member Z
HINT1	histidine triad nucleotide binding protein 1
HNRNPA1	heterogeneous nuclear ribonucleoprotein A1
HNRNPH1	heterogeneous nuclear ribonucleoprotein H1 (H)
HNRNPM	heterogeneous nuclear ribonucleoprotein M
HNRNPU	heterogeneous nuclear ribonucleoprotein U (scaffold attachment factor A)
HSP90AB1	heat shock protein 90kDa alpha (cytosolic), class B member 1
IK	IK cytokine, down-regulator of HLA II
ILF2	interleukin enhancer binding factor 2
KHDRBS1	KH domain containing, RNA binding, signal transduction associated 1
NCL	nucleolin
NONO	non-POU domain containing, octamer-binding
NPM1	nucleophosmin (nucleolar phosphoprotein B23, numatrin)
PNN	pinin, desmosome associated protein
POLG	polymerase (DNA directed), gamma
POLR2G	polymerase (RNA) II (DNA directed) polypeptide G
PPIA	peptidylprolyl isomerase A (cyclophilin A)
PPP1CC	protein phosphatase 1, catalytic subunit, gamma isozyme
PRMT1	protein arginine methyltransferase 1
PSMA1	proteasome (prosome, macropain) subunit, alpha type, 1
PSMA2	proteasome (prosome, macropain) subunit, alpha type, 2
PSMA5	proteasome (prosome, macropain) subunit, alpha type, 5
PSMB4	proteasome (prosome, macropain) subunit, beta type, 4
PSME1	proteasome (prosome, macropain) activator subunit 1 (PA28 alpha)
PTMA	prothymosin, alpha
PWP1	PWP1 homolog (S. cerevisiae)
QARS	glutaminyl-tRNA synthetase
RABGGTB	Rab geranylgeranyltransferase, beta subunit
RPL10A	ribosomal protein L10a
RPL11	ribosomal protein L11
RPL13A	ribosomal protein L13a
RPL17	ribosomal protein L17
RPL18	ribosomal protein L18
RPL19	ribosomal protein L19
RPL23	ribosomal protein L23
RPL27	ribosomal protein L27
RPL28	ribosomal protein L28
RPL31	ribosomal protein L31
RPL32	ribosomal protein L32
RPL34	ribosomal protein L34
RPL35	ribosomal protein L35
RPL36A	ribosomal protein L36a
RPL4	ribosomal protein L4
RPL6	ribosomal protein L6
RPL7	ribosomal protein L7
RPL7A	ribosomal protein L7a
RPL9	ribosomal protein L9
RPS11	ribosomal protein S11
RPS14	ribosomal protein S14
RPS16	ribosomal protein S16
RPS18	ribosomal protein S18
RPS19	ribosomal protein S19
RPS23	ribosomal protein S23
RPS24	ribosomal protein S24
RPS28	ribosomal protein S28
RPS3	ribosomal protein S3
RPS3A	ribosomal protein S3A
RPS5	ribosomal protein S5
RPS6	ribosomal protein S6
RPS8	ribosomal protein S8
RPS9	ribosomal protein S9
SAP18	Sin3A-associated protein, 18kDa
SET	SET nuclear proto-oncogene
SLC25A3	solute carrier family 25 (mitochondrial carrier; phosphate carrier), member 3
SNRPA1	small nuclear ribonucleoprotein polypeptide A'
SNRPD2	small nuclear ribonucleoprotein D2 polypeptide 16.5kDa
SNRPD3	small nuclear ribonucleoprotein D3 polypeptide 18kDa
SNRPE	small nuclear ribonucleoprotein polypeptide E
SNRPF	small nuclear ribonucleoprotein polypeptide F
SRSF9	serine/arginine-rich splicing factor 9
SUMO2	small ubiquitin-like modifier 2
TAF9	TAF9 RNA polymerase II, TATA box binding protein (TBP)-associated factor, 32kDa
TBCB	tubulin folding cofactor B
TCP1	t-complex 1
TIAL1	TIA1 cytotoxic granule-associated RNA binding protein-like 1
TPT1	tumor protein, translationally-controlled 1
TRIM28	tripartite motif containing 28
UBE2L3	ubiquitin-conjugating enzyme E2L 3
UQCRH	ubiquinol-cytochrome c reductase hinge protein
